# Supplementary material for: Insight into small molecule binding to the neonatal Fc receptor by X-ray crystallography and 100 kHz magic-angle-spinning NMR
Source: PubMed Central journal article supplement (PMC5983862; doi:10.1371/journal.pbio.2006192), 2018-05-21
Supplement: pbio.2006192.s017.pdf [file pbio.2006192.s017.pdf]

|                                                             | FcRn <sub>ECD</sub>     | FcRn <sub>ECD</sub> -UCB-FcRn-84 | FcRn <sub>ECD</sub> -UCB-FcRn-303 |
|-------------------------------------------------------------|-------------------------|----------------------------------|-----------------------------------|
| <b>Data Collection</b>                                      |                         |                                  |                                   |
| Space Group                                                 | <i>P</i> 2 <sub>1</sub> | <i>P</i> 2 <sub>1</sub>          | <i>P</i> 2 <sub>1</sub>           |
| Cell dimensions                                             |                         |                                  |                                   |
| <i>a</i> , <i>b</i> , <i>c</i> (Å)                          | 42.10, 76.25, 140.15    | 42.27, 76.29, 138.06             | 41.77, 76.29, 138.06              |
| $\alpha$ , $\beta$ , $\gamma$ (°)                           | 90.000, 93.755, 90.000  | 90.000, 90.014, 90.000           | 90.000, 93.561, 90.000            |
| Resolution (Å)                                              | 2.00 (2.05-2.00)        | 1.85 (1.90-1.85)                 | 2.00 (2.05-2.00)                  |
| <i>R</i> <sub>merge</sub> (%)                               | 0.076 (0.545)           | 0.070 (0.559)                    | 0.071 (0.517)                     |
| <i>I</i> / $\sigma$ ( <i>I</i> )                            | 10.91 (2.39)            | 12.52 (3.22)                     | 13.96 (2.51)                      |
| Completeness (%)                                            | 98.8 (98.9)             | 98.4 (98.0)                      | 99.8 (99.9)                       |
| Redundancy                                                  | 3.00 (3.00)             | 3.72 (3.77)                      | 3.79 (3.81)                       |
| <b>Refinement</b>                                           |                         |                                  |                                   |
| Resolution (Å)                                              | 2.00                    | 1.85                             | 2.00                              |
| No. reflections                                             | 59,210                  | 73,773                           | 59,144                            |
| <i>R</i> <sub>work</sub> / <i>R</i> <sub>free</sub> overall | 17.4 / 21.0             | 17.2 / 21.3                      | 18.9 / 22.0                       |
| No. atoms                                                   |                         |                                  |                                   |
| Protein                                                     | 5762                    | 5718                             | 5583                              |
| Ligand                                                      | 18                      | 59                               | 111                               |
| Water                                                       | 486                     | 448                              | 360                               |
| ADP (Å <sup>2</sup> )                                       |                         |                                  |                                   |
| Protein                                                     | 35.24                   | 28.59                            | 32.88                             |
| Ligand                                                      | 51.93                   | 24.88                            | 35.29                             |
| Water                                                       | 39.85                   | 36.75                            | 37.42                             |
| r.m.s. deviations                                           |                         |                                  |                                   |
| Bond lengths (Å)                                            | 0.007                   | 0.007                            | 0.007                             |
| Bond angles (°)                                             | 0.90                    | 0.95                             | 0.91                              |
