# Supplementary material for: Insight into small molecule binding to the neonatal Fc receptor by X-ray crystallography and 100 kHz magic-angle-spinning NMR
Source: PubMed Central journal article supplement (PMC5983862; doi:10.1371/journal.pbio.2006192), 2018-05-21
Supplement: pbio.2006192.s021.pdf [file pbio.2006192.s021.pdf]

### **FcRn<sub>ECD</sub> adopts a similar structure in solution and sedimented samples**

To ensure the overall structure of FcRn<sub>ECD</sub> is very similar in solution and after sedimentation, we recorded a <sup>15</sup>N-<sup>1</sup>H TROSY spectrum of fully protonated [<sup>13</sup>C, <sup>15</sup>N]-labeled FcRn<sub>ECD</sub> (S8 Fig). The comparison with the <sup>15</sup>N-<sup>1</sup>H correlation spectrum acquired at 100 kHz MAS after sedimentation exhibits only a few chemical-shift differences (S8 Fig). Therefore, we conclude the overall constitution of FcRn<sub>ECD</sub> after sedimentation to be the same as in solution since the spectra look very similar.
